# Supplementary material for: CAl4X4 (X = Te, Po): Double Aromatic Molecular Stars Containing Planar Tetracoordinate Carbon Atoms
Source: MDPI journal article supplement (doi:10.3390/molecules28073280), 2023-04-06
Supplement: s1 [file s1]

## SUPPLEMENTARY INFORMATION

# CAI<sub>4</sub>X<sub>4</sub> (X = Te, Po): Double Aromatic Molecular Stars Containing Planar Tetracoordinate Carbon Atoms

Li-Xia Bai and Jin-Chang Guo \*

Nanocluster Laboratory, Institute of Molecular Science, Shanxi University, Taiyuan 030006, China; bailixia2021@163.com

\* Correspondence: guojc@sxu.edu.cn

### Table of Contents

- Table S1.** Orbital composition analysis of canonical molecular orbitals (CMOs) of the global-minimum structure **1** ( $D_{4h}$ ,  $^1A_{1g}$ ) of CAI<sub>4</sub>Te<sub>4</sub> cluster.
- Table S2.** Orbital composition analysis of canonical molecular orbitals (CMOs) of the global-minimum structure **2** ( $D_{4h}$ ,  $^1A_{1g}$ ) of CAI<sub>4</sub>Po<sub>4</sub> cluster.
- Figure S1.** Analysis of canonical molecular orbitals (CMOs) of  $D_{4h}$  CAI<sub>4</sub>Po<sub>4</sub> (**2**) cluster.
- Figure S2.** Chemical bonding pattern for CAI<sub>4</sub>Po<sub>4</sub> (**2**) cluster, according to the adaptive natural density partitioning (AdNDP) analysis. Occupation numbers (ONs) are shown.
- Figure S3.** Color-filled maps of ICSS<sub>zz</sub> (in ppm) for the CAI<sub>4</sub>Po<sub>4</sub> (**2**) cluster. Positive values indicate aromaticity. 0 and 1 in parentheses represent the height above the molecular planes (in Å).

Cartesian coordinates of optimized structures of the species reported in the text.

**Table S1.** Orbital composition analysis of canonical molecular orbitals (CMOs) of the global-minimum structure **1** ( $D_{4h}$ ,  $^1A_{1g}$ ) of  $CAI_4Te_4$  cluster.

| CMO                                                                                                      | C (%)      |       | Al <sub>4</sub> (%) |       | Te <sub>4</sub> (%) |       | MOs Energies (eV) |
|----------------------------------------------------------------------------------------------------------|------------|-------|---------------------|-------|---------------------|-------|-------------------|
|                                                                                                          | s/p        | total | s/p                 | total | s/p                 | total |                   |
| 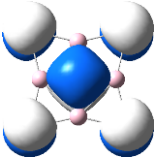<br>HOMO ( $a_{2u}$ )   | 0.00/38.13 | 38.13 | 0.00/0.00           | 0.00  | 0.00/61.09          | 61.09 | -6.94             |
| <br>HOMO-1 ( $b_{1u}$ ) | 0.00/0.00  | 0.00  | 0.00/0.00           | 0.00  | 0.00/97.97          | 97.97 | -7.48             |
| <br>HOMO-2 ( $e_g$ )   | 0.00/0.00  | 0.00  | 0.00/13.94          | 13.94 | 0.00/84.86          | 84.86 | -7.89             |
| <br>HOMO-2'( $e_g$ )  | 0.00/0.00  | 0.00  | 0.00/13.94          | 13.94 | 0.00/84.86          | 84.86 | -7.89             |
| <br>HOMO-3 ( $e_u$ )  | 0.00/24.28 | 24.28 | 0.00/4.65           | 4.65  | 0.00/67.48          | 67.48 | -7.97             |
| <br>HOMO-3'( $e_u$ )  | 0.00/24.28 | 24.28 | 0.00/4.65           | 4.65  | 0.00/67.48          | 67.48 | -7.97             |

| CMO                                                                                                              | C (%)      |       | Al <sub>4</sub> (%) |       | Te <sub>4</sub> (%) |       | MOs Energies<br>(eV) |
|------------------------------------------------------------------------------------------------------------------|------------|-------|---------------------|-------|---------------------|-------|----------------------|
|                                                                                                                  | s/p        | total | s/p                 | total | s/p                 | total |                      |
| 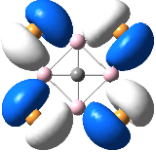<br>HOMO-4 (a <sub>2g</sub> )   | 0.00/0.00  | 0.00  | 0.00/13.72          | 13.72 | 0.00/85.13          | 85.13 | -8.13                |
| <br>HOMO-5 (e <sub>u</sub> )    | 0.00/8.31  | 8.31  | 11.93/16.46         | 28.39 | 0.00/61.84          | 61.84 | -9.23                |
| <br>HOMO-5' (e <sub>u</sub> )   | 0.00/8.31  | 8.31  | 11.93/16.46         | 28.39 | 0.00/61.84          | 61.84 | -9.23                |
| <br>HOMO-6 (a <sub>2u</sub> ) | 0.00/44.32 | 44.32 | 0.00/28.34          | 28.34 | 0.00/26.13          | 26.13 | -9.37                |
| <br>HOMO-7 (b <sub>2g</sub> ) | 0.00/0.00  | 0.00  | 0.00/14.64          | 14.64 | 7.96/75.40          | 83.36 | -9.56                |
| <br>HOMO-8 (a <sub>1g</sub> ) | 8.00/0.00  | 8.00  | 14.59/0.00          | 14.59 | 8.92/65.66          | 74.58 | -10.13               |
| <br>HOMO-9 (b <sub>1g</sub> ) | 0.00/0.00  | 0.00  | 31.97/12.82         | 44.79 | 0.00/53.30          | 53.30 | -10.67               |

**Table S2.** Orbital composition analysis of canonical molecular orbitals (CMOs) of the global-minimum structure **2** ( $D_{4h}$ ,  $^1A_{1g}$ ) of  $CAI_4Po_4$  cluster.

| CMO                                                                                                        | C (%)      |       | Al <sub>4</sub> (%) |       | Po <sub>4</sub> (%) |       | MOs Energies (eV) |
|------------------------------------------------------------------------------------------------------------|------------|-------|---------------------|-------|---------------------|-------|-------------------|
|                                                                                                            | s/p        | total | s/p                 | total | s/p                 | total |                   |
| 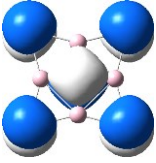<br>HOMO ( $a_{2u}$ )     | 0.00/32.98 | 32.98 | 0.00/0.00           | 0.00  | 0.00/65.90          | 65.90 | -6.69             |
| <br>HOMO-1 ( $b_{1u}$ )   | 0.00/0.00  | 0.00  | 0.00/0.00           | 0.00  | 0.00/98.09          | 98.09 | -7.06             |
| <br>HOMO-2 ( $e_g$ )     | 0.00/0.00  | 0.00  | 0.00/14.32          | 14.32 | 0.00/84.60          | 84.60 | -7.47             |
| <br>HOMO-2' ( $e_g$ )   | 0.00/0.00  | 0.00  | 0.00/14.32          | 14.32 | 0.00/84.60          | 84.60 | -7.47             |
| <br>HOMO-3 ( $a_{2g}$ ) | 0.00/0.00  | 0.00  | 0.00/13.20          | 13.20 | 0.00/85.81          | 85.81 | -7.58             |
| <br>HOMO-4 ( $e_u$ )    | 0.00/20.30 | 20.30 | 0.00/7.24           | 7.24  | 0.00/69.68          | 69.68 | -7.69             |

| CMO                                                                                                              | C (%)      |       | Al <sub>4</sub> (%) |       | Po <sub>4</sub> (%) |       | MOs Energies<br>(eV) |
|------------------------------------------------------------------------------------------------------------------|------------|-------|---------------------|-------|---------------------|-------|----------------------|
|                                                                                                                  | s/p        | total | s/p                 | total | s/p                 | total |                      |
| 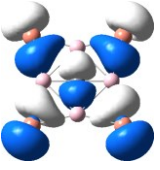<br>HOMO-4' (e <sub>u</sub> )   | 0.00/20.30 | 20.30 | 0.00/7.24           | 7.24  | 0.00/69.68          | 69.68 | -7.69                |
| <br>HOMO-5 (e <sub>u</sub> )    | 0.00/11.76 | 11.76 | 13.18/16.06         | 29.24 | 0.00/57.62          | 57.62 | -8.80                |
| <br>HOMO-5' (e <sub>u</sub> )   | 0.00/11.76 | 11.76 | 13.18/16.06         | 29.24 | 0.00/57.62          | 57.62 | -8.80                |
| <br>HOMO-6 (a <sub>2u</sub> ) | 0.00/49.42 | 49.42 | 0.00/28.26          | 28.26 | 0.00/21.10          | 21.10 | -9.10                |
| <br>HOMO-7 (b <sub>2g</sub> ) | 0.00/0.00  | 0.00  | 0.00/19.70          | 19.70 | 6.03/72.43          | 78.46 | -9.30                |
| <br>HOMO-8 (a <sub>1g</sub> ) | 8.88/0.00  | 8.88  | 20.09/0.00          | 20.09 | 6.44/61.21          | 67.65 | -10.12               |
| <br>HOMO-9 (b <sub>1g</sub> ) | 0.00/0.00  | 0.00  | 33.41/13.76         | 47.17 | 0.00/51.05          | 51.05 | -10.22               |

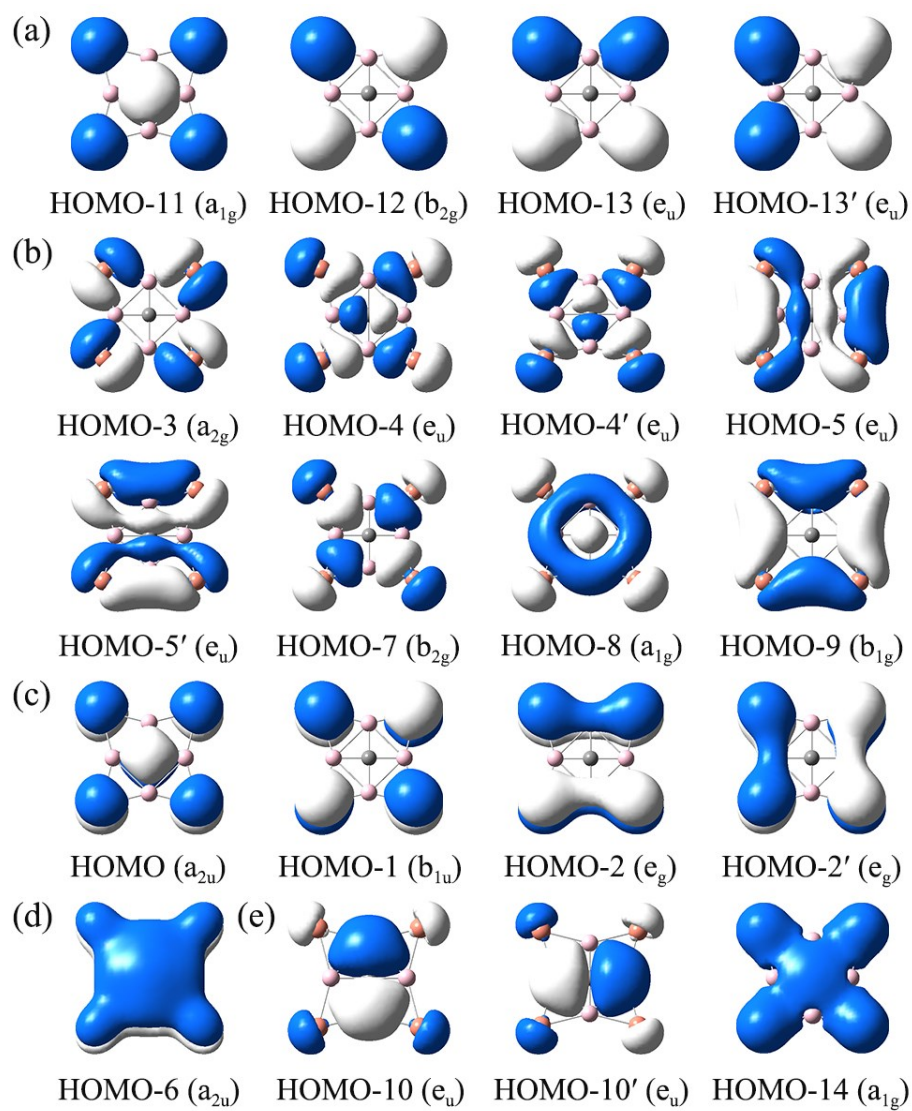

**Figure S1.** Analysis of canonical molecular orbitals (CMOs) of  $D_{4h}$   $\text{CaAl}_4\text{Po}_4$  (**2**) cluster.

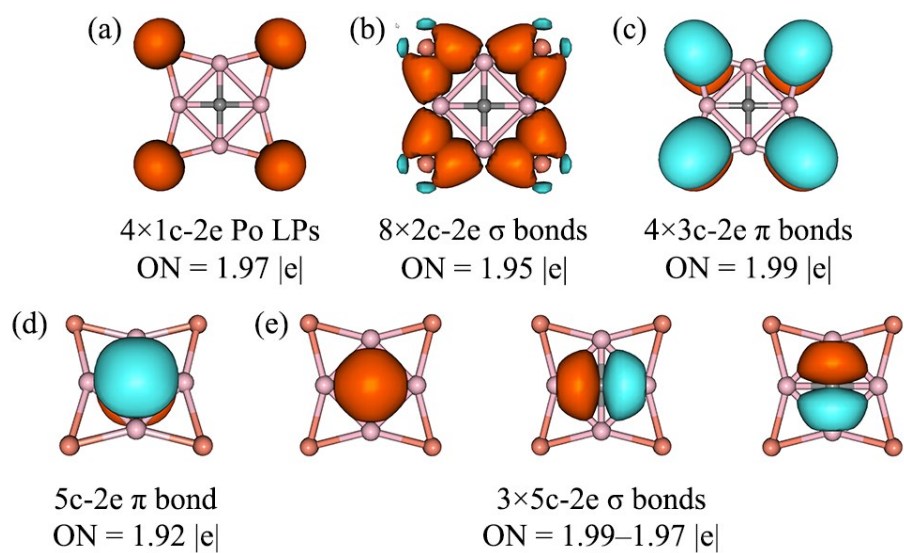

**Figure S2.** Chemical bonding pattern for  $CAI_4Po_4(2)$  cluster, according to the adaptive natural density partitioning (AdNDP) analysis. Occupation numbers (ONs) are shown.

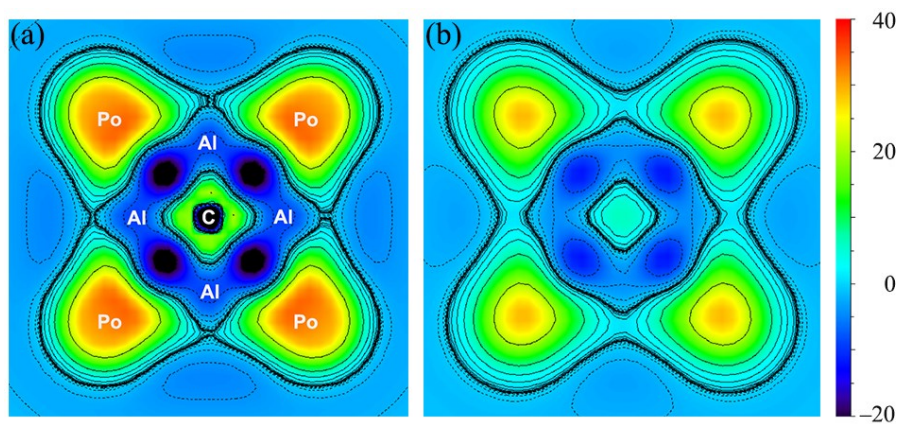

**Figure S3.** Color-filled maps of  $ICSS_{zz}$  (in ppm) for the  $CAl_4Po_4(2)$  cluster. Positive values indicate aromaticity. 0 and 1 in parentheses represent the height above the molecular planes (in Å).



Cartesian coordinates of optimized structures of the species reported in the text.

**1**

|    |             |             |            |
|----|-------------|-------------|------------|
| Al | 0.00000000  | 1.90473200  | 0.00000000 |
| Al | 1.90473200  | 0.00000000  | 0.00000000 |
| Al | -1.90473200 | 0.00000000  | 0.00000000 |
| Al | 0.00000000  | -1.90473200 | 0.00000000 |
| C  | 0.00000000  | 0.00000000  | 0.00000000 |
| Te | -2.49474500 | 2.49474500  | 0.00000000 |
| Te | -2.49474500 | -2.49474500 | 0.00000000 |
| Te | 2.49474500  | 2.49474500  | 0.00000000 |
| Te | 2.49474500  | -2.49474500 | 0.00000000 |

**1B**

|    |             |             |             |
|----|-------------|-------------|-------------|
| C  | 0.54429900  | -0.04779300 | 0.00000000  |
| Al | -0.42538700 | 0.88076000  | 1.39335700  |
| Al | -0.42538700 | 0.88076000  | -1.39335700 |
| Al | 0.45302200  | -1.76989500 | 1.21302600  |
| Al | 0.45302200  | -1.76989500 | -1.21302600 |
| Te | -0.42538700 | -0.66169700 | 3.39065100  |
| Te | 2.63326700  | -0.70184500 | 0.00000000  |
| Te | -1.85911400 | 2.47532000  | 0.00000000  |
| Te | -0.42538700 | -0.66169700 | -3.39065100 |

**1C**

|    |             |             |             |
|----|-------------|-------------|-------------|
| C  | 0.00000000  | 0.00007500  | 0.55192100  |
| Al | 0.00000000  | 1.57152000  | -0.60940500 |
| Al | -1.36096600 | -0.78566400 | -0.60938800 |
| Al | 1.36096600  | -0.78566400 | -0.60938800 |
| Al | 0.00000000  | 0.00005100  | 2.42125400  |
| Te | 0.00000000  | -2.70433200 | -1.65605300 |
| Te | 0.00000000  | -0.00034700 | 4.76095500  |
| Te | -2.34200000 | 1.35218000  | -1.65665300 |
| Te | 2.34200000  | 1.35218000  | -1.65665300 |

**1D**

|    |             |             |            |
|----|-------------|-------------|------------|
| C  | 0.00000000  | 0.82757900  | 0.00000000 |
| Al | 0.12459800  | 2.81169400  | 0.00000000 |
| Al | 1.86483900  | 1.18012700  | 0.00000000 |
| Al | -1.92228700 | 1.05004900  | 0.00000000 |
| Al | -0.28766500 | -1.05448000 | 0.00000000 |
| Te | 3.58804000  | -0.66879100 | 0.00000000 |
| Te | 1.66282000  | -2.67245000 | 0.00000000 |
| Te | -2.34161800 | 3.55423900  | 0.00000000 |

|    |             |             |            |
|----|-------------|-------------|------------|
| Te | -2.85411400 | -1.30533600 | 0.00000000 |
|----|-------------|-------------|------------|

## 1E

|   |             |             |            |
|---|-------------|-------------|------------|
| C | -0.13989300 | -0.68163100 | 0.48970800 |
|---|-------------|-------------|------------|

|    |            |             |             |
|----|------------|-------------|-------------|
| Al | 1.33059200 | -1.88915000 | -0.48063000 |
|----|------------|-------------|-------------|

|    |            |            |            |
|----|------------|------------|------------|
| Al | 1.09853400 | 0.83087900 | 0.08432000 |
|----|------------|------------|------------|

|    |             |            |            |
|----|-------------|------------|------------|
| Al | -1.60800200 | 0.55940800 | 0.39928800 |
|----|-------------|------------|------------|

|    |             |             |             |
|----|-------------|-------------|-------------|
| Al | -1.13866300 | -2.11256800 | -0.42224100 |
|----|-------------|-------------|-------------|

|    |            |             |             |
|----|------------|-------------|-------------|
| Te | 2.66283200 | -0.06139500 | -1.73934700 |
|----|------------|-------------|-------------|

|    |             |             |             |
|----|-------------|-------------|-------------|
| Te | -3.40713500 | -0.92327800 | -0.65792500 |
|----|-------------|-------------|-------------|

|    |            |             |            |
|----|------------|-------------|------------|
| Te | 1.35056800 | -1.12447300 | 2.05444400 |
|----|------------|-------------|------------|

|    |             |            |            |
|----|-------------|------------|------------|
| Te | -0.51073900 | 2.84065300 | 0.39114000 |
|----|-------------|------------|------------|

## 2

|    |            |            |            |
|----|------------|------------|------------|
| Al | 0.00000000 | 1.91257100 | 0.00000000 |
|----|------------|------------|------------|

|    |            |            |            |
|----|------------|------------|------------|
| Al | 1.91257100 | 0.00000000 | 0.00000000 |
|----|------------|------------|------------|

|    |             |            |            |
|----|-------------|------------|------------|
| Al | -1.91257100 | 0.00000000 | 0.00000000 |
|----|-------------|------------|------------|

|    |            |             |            |
|----|------------|-------------|------------|
| Al | 0.00000000 | -1.91257100 | 0.00000000 |
|----|------------|-------------|------------|

|   |            |            |            |
|---|------------|------------|------------|
| C | 0.00000000 | 0.00000000 | 0.00000000 |
|---|------------|------------|------------|

|    |             |            |            |
|----|-------------|------------|------------|
| Po | -2.56453700 | 2.56453700 | 0.00000000 |
|----|-------------|------------|------------|

|    |             |             |            |
|----|-------------|-------------|------------|
| Po | -2.56453700 | -2.56453700 | 0.00000000 |
|----|-------------|-------------|------------|

|    |            |            |            |
|----|------------|------------|------------|
| Po | 2.56453700 | 2.56453700 | 0.00000000 |
|----|------------|------------|------------|

|    |            |             |            |
|----|------------|-------------|------------|
| Po | 2.56453700 | -2.56453700 | 0.00000000 |
|----|------------|-------------|------------|

## 2B

|   |             |            |            |
|---|-------------|------------|------------|
| C | -0.75347800 | 1.28561400 | 0.00000000 |
|---|-------------|------------|------------|

|    |            |            |            |
|----|------------|------------|------------|
| Al | 0.63385000 | 1.42571100 | 1.35921900 |
|----|------------|------------|------------|

|    |             |            |            |
|----|-------------|------------|------------|
| Al | -2.56351100 | 1.00717200 | 0.00000000 |
|----|-------------|------------|------------|

|    |            |            |             |
|----|------------|------------|-------------|
| Al | 0.63385000 | 1.42571100 | -1.35921900 |
|----|------------|------------|-------------|

|    |             |             |            |
|----|-------------|-------------|------------|
| Al | -0.62596500 | -0.82001800 | 0.00000000 |
|----|-------------|-------------|------------|

|    |            |             |            |
|----|------------|-------------|------------|
| Po | 0.63385000 | -0.97460900 | 2.40781600 |
|----|------------|-------------|------------|

|    |             |             |            |
|----|-------------|-------------|------------|
| Po | -3.40826800 | -1.37347700 | 0.00000000 |
|----|-------------|-------------|------------|

|    |            |            |            |
|----|------------|------------|------------|
| Po | 2.49180600 | 2.76061000 | 0.00000000 |
|----|------------|------------|------------|

|    |            |             |             |
|----|------------|-------------|-------------|
| Po | 0.63385000 | -0.97460900 | -2.40781600 |
|----|------------|-------------|-------------|

## 2C

|   |            |             |            |
|---|------------|-------------|------------|
| C | 0.44801600 | -0.18275100 | 0.00000000 |
|---|------------|-------------|------------|

|    |            |             |            |
|----|------------|-------------|------------|
| Al | 0.43630600 | -1.87390000 | 1.21711600 |
|----|------------|-------------|------------|

|    |             |            |             |
|----|-------------|------------|-------------|
| Al | -0.44205300 | 0.81090400 | -1.40287500 |
|----|-------------|------------|-------------|

|    |             |            |            |
|----|-------------|------------|------------|
| Al | -0.44205300 | 0.81090400 | 1.40287500 |
|----|-------------|------------|------------|

|    |            |             |             |
|----|------------|-------------|-------------|
| Al | 0.43630600 | -1.87390000 | -1.21711600 |
|----|------------|-------------|-------------|

|    |            |             |            |
|----|------------|-------------|------------|
| Po | 2.68955500 | -0.71811000 | 0.00000000 |
|----|------------|-------------|------------|

|    |             |             |             |
|----|-------------|-------------|-------------|
| Po | -0.44205300 | -0.75264000 | -3.49288300 |
| Po | -0.44205300 | -0.75264000 | 3.49288300  |
| Po | -1.83567100 | 2.56546600  | 0.00000000  |

## 2D

|    |             |             |            |
|----|-------------|-------------|------------|
| C  | 0.00000000  | 0.92614000  | 0.00000000 |
| Al | -0.30569500 | -0.95811200 | 0.00000000 |
| Al | -1.92426100 | 1.17509500  | 0.00000000 |
| Al | 0.15595100  | 2.91841800  | 0.00000000 |
| Al | 1.87325600  | 1.26412800  | 0.00000000 |
| Po | -2.36332100 | 3.76484700  | 0.00000000 |
| Po | -2.96006900 | -1.22656700 | 0.00000000 |
| Po | 3.70514100  | -0.58810900 | 0.00000000 |
| Po | 1.64931700  | -2.69720300 | 0.00000000 |

## 2E

|    |             |            |             |
|----|-------------|------------|-------------|
| C  | -1.39441700 | 1.13129300 | 0.00000000  |
| Al | -0.64633100 | 0.20564100 | 1.51915400  |
| Al | 0.16363900  | 2.31587700 | 0.00000000  |
| Al | -0.64633100 | 0.20564100 | -1.51915400 |
| Al | -3.25306800 | 1.72759800 | 0.00000000  |

|    |             |             |             |
|----|-------------|-------------|-------------|
| Po | 1.03522200  | 2.03678900  | 2.48150900  |
| Po | 1.03522200  | 2.03678900  | -2.48150900 |
| Po | -0.64633100 | -2.42190600 | 1.48657900  |
| Po | -0.64633100 | -2.42190600 | -1.48657900 |
